# Supplementary material for: Arterial Blood Gas Analysis for Survival Prediction in Pediatric Patients with Out-of-Hospital Cardiac Arrest
Source: MDPI journal article supplement (doi:10.3390/jpm13071061), 2023-06-28

Supplementary Figure S1. Cut-off values of arterial blood gas analysis variables for survival to hospital admission using receiver operating characteristic curves. AUC, area under the curve. (A) pH, (B) PaCO<sub>2</sub>, (C) PaO<sub>2</sub>, (D) Lactate.

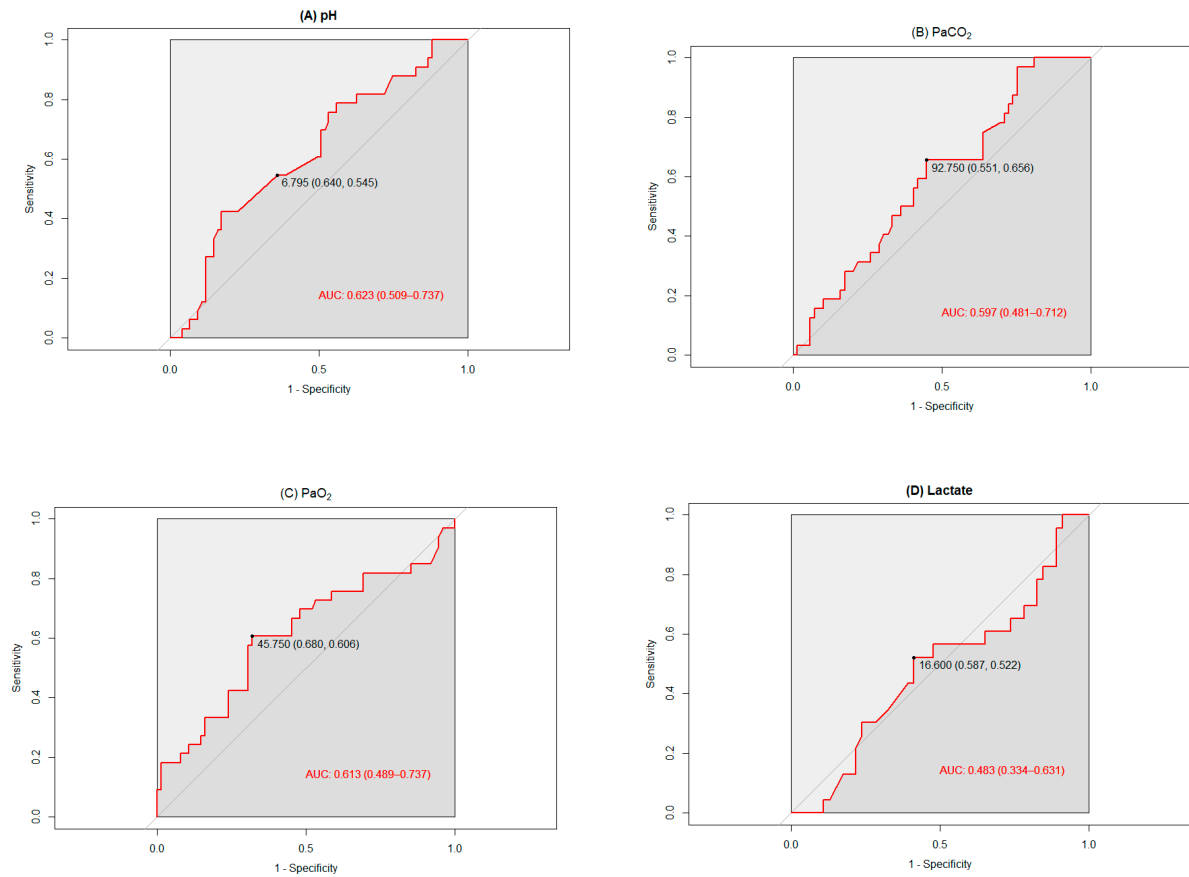

Supplementary Figure S2. Cut-off values of arterial blood gas analysis variables for survival to discharge using receiver operating characteristic curves. AUC, area under the curve. (A) pH, (B) PaCO<sub>2</sub>, (C) PaO<sub>2</sub>, (D) Lactate.

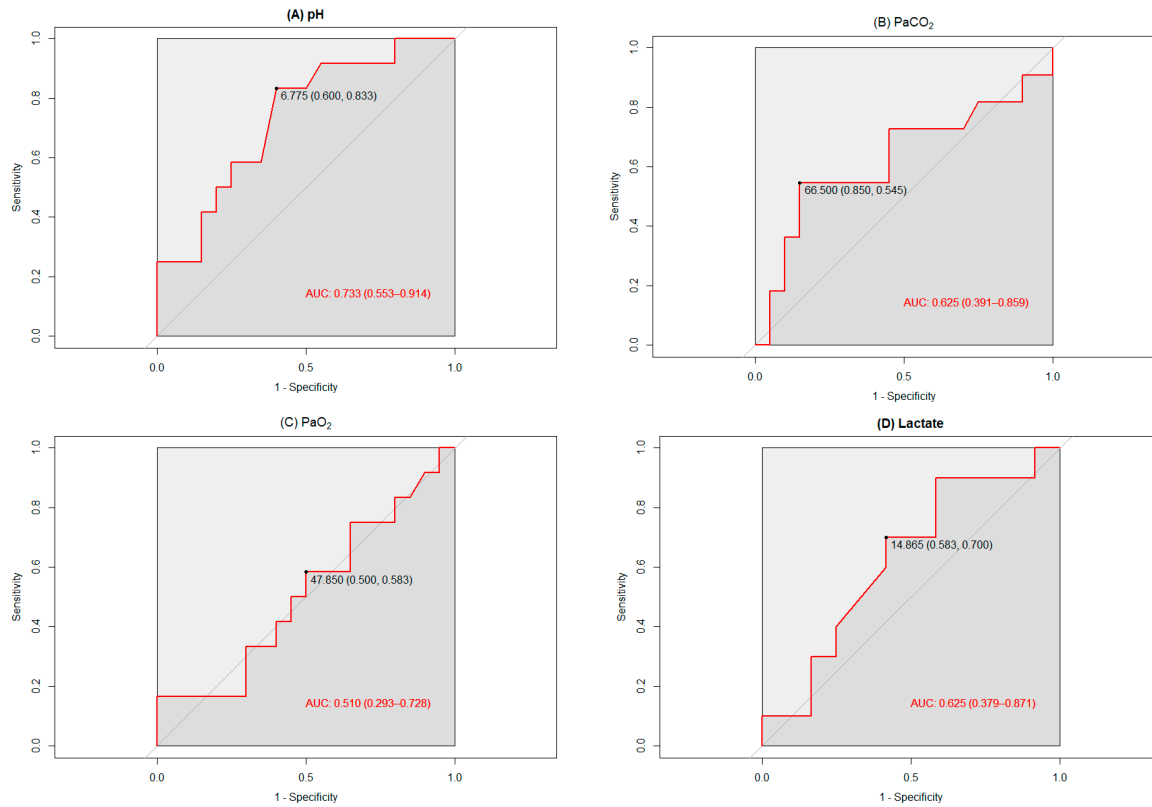

Supplement: s1 [file s1]
